# Supplementary material
Source: publisher site journal article supplement (https://www.spandidos-publications.com/3398/downloadSupplementary)

Figure S1. Transfection efficiency of miR-150 mimic, miR-150 inhibitor, pcDNA-STAT1 and si-STAT1 into THP-1 cells. Expression of miR-150 in THP-1 cells as measured by reverse transcription-quantitative PCR following transfection with (A) miR-150 mimics and (B) miR-150 inhibitor in comparison with their corresponding negative controls. \*\*\*P<0.001 vs. miR-NC or anti-miR-NC. The expression levels of STAT1 protein in THP-1 cells measured by western blotting following transfection with (C) pcDNA-STAT1 and (D) si-STAT1 in comparison with their corresponding negative controls. \*\*\*P<0.001 vs. pcDNA or si-NC. miR, microRNA; miR-NC, miR mimic negative control; anti-miR-NC, miR inhibitor negative control; si, small-interfering RNA; si-NC, si negative control.

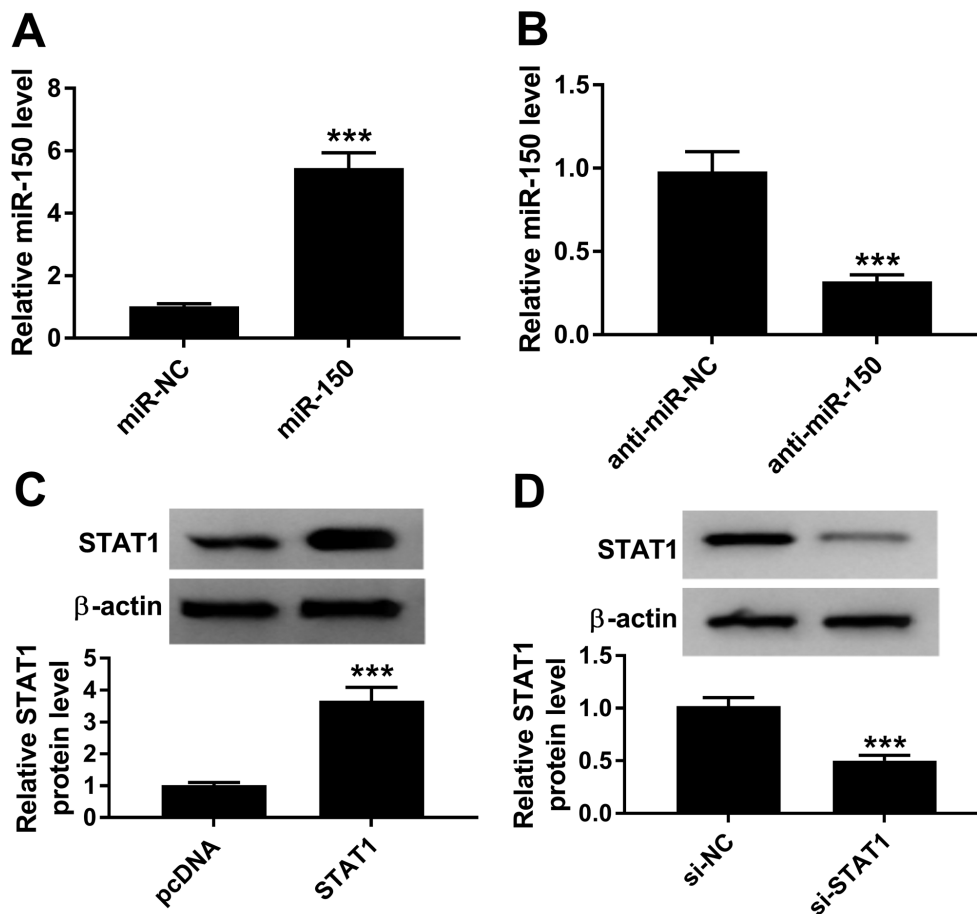

Supplement: Supplementary file 1 [file downloadSupplementary]
